# Supplementary material for: Indomethacin augments lipopolysaccharide-induced expression of inflammatory molecules in the mouse brain
Source: PubMed Central journal article supplement (PMC7680052; doi:10.7717/peerj.10391), 2020-11-18
Supplement: peerj-08-10391-s012.pdf [file peerj-08-10391-s012.pdf]

Iba-1

Control LPS

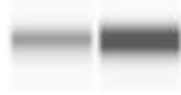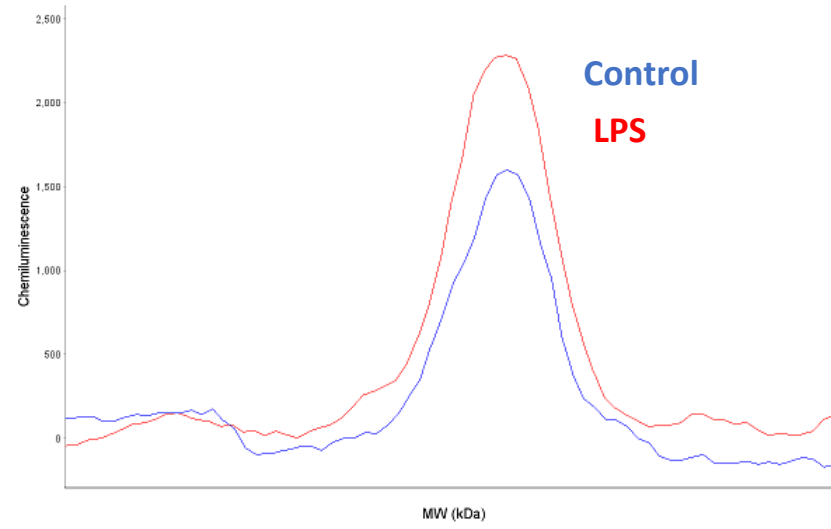

Actin

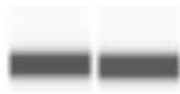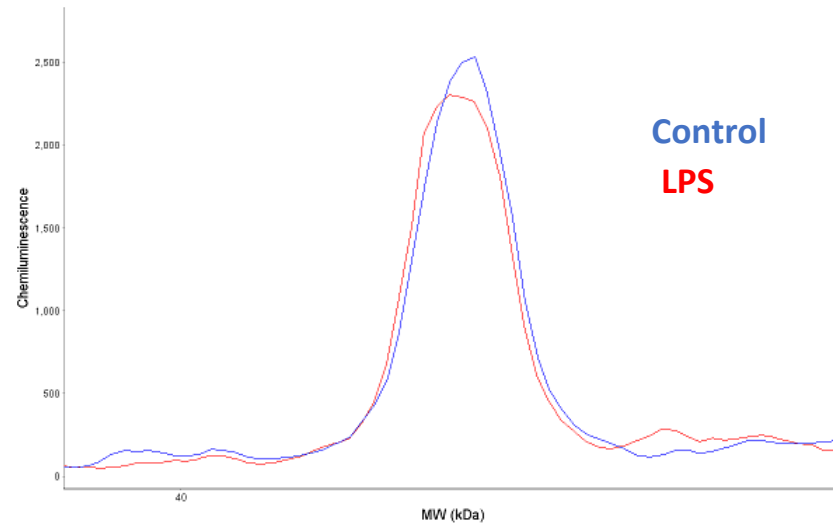

| Sample  | Primary | Height | Area        |
|---------|---------|--------|-------------|
| Control | Actin   | 2520.3 | 24278       |
| LPS     | Actin   | 2406.1 | 23871       |
|         |         |        |             |
| Sample  | Primary | Height | Area        |
| Control | Iba-1   | 1606.3 | 16705       |
| LPS     | Iba-1   | 2354.5 | 26804       |
|         |         |        |             |
| Sample  |         |        | Iba-1/Actin |
| Control |         |        | 0.68807151  |
| LPS     |         |        | 1.12286875  |
