# Supplementary material for: Indomethacin augments lipopolysaccharide-induced expression of inflammatory molecules in the mouse brain
Source: PubMed Central journal article supplement (PMC7680052; doi:10.7717/peerj.10391), 2020-11-18

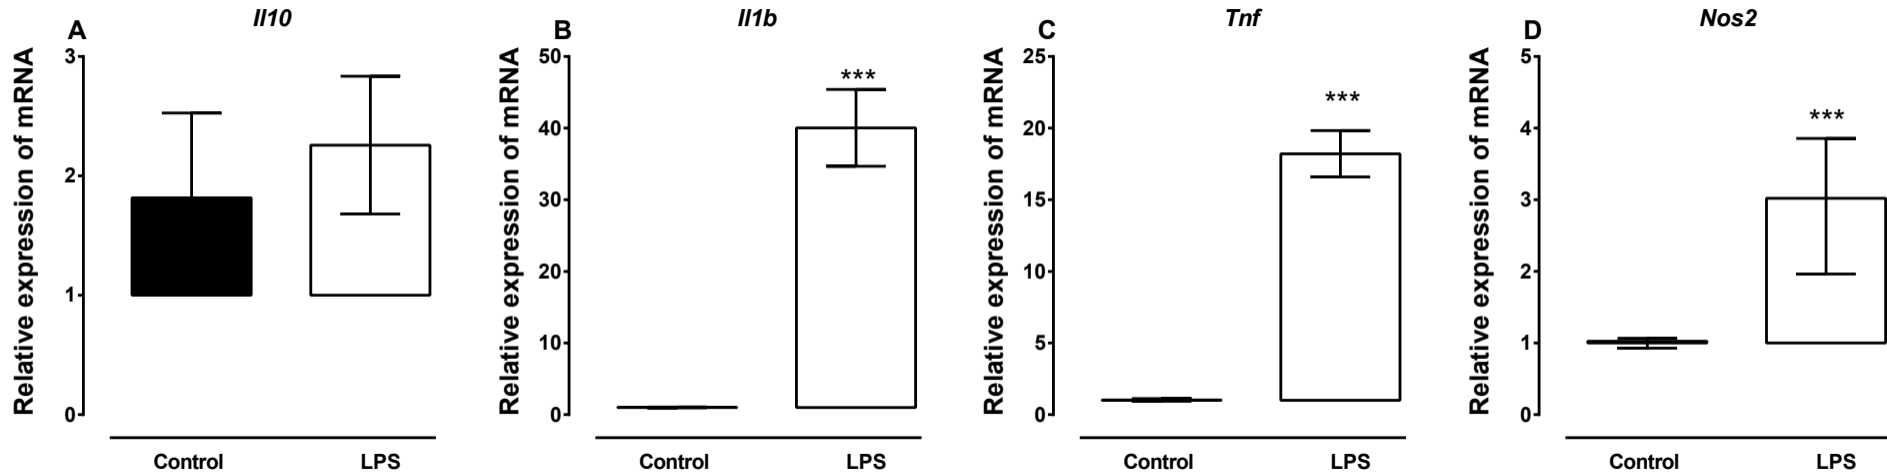

Supplement: peerj-08-10391-s014.pdf [file peerj-08-10391-s014.pdf]
