# Supplementary material for: Indomethacin augments lipopolysaccharide-induced expression of inflammatory molecules in the mouse brain
Source: PeerJ. 2020 Nov 18;8:e10391. doi: 10.7717/peerj.10391 (PMC7680052; doi:10.7717/peerj.10391)
Supplement: Supplemental Information 6 [file peerj-08-10391-s006.xlsx]

## Sheet: Sheet1
Sample	Primary	Height	Area
Control	Actin	2520.3	24278
LPS	Actin	2406.1	23871
Sample	Primary	Height	Area
Control	Iba-1	1606.3	16705
LPS	Iba-1	2354.5	26804
Sample			Iba-1/Actin
Control			0.688072
LPS			1.12287
Relative protein expression
Sample			Sample/control
Control			1
LPS			1.63191
